# Supplementary material
Source: Springer Nature journal article supplement (https://www.springermedizin.de/resource/supplementary/12916_2009_210_MOESM11_ESM.pdf/9599400)

Review: Clinical pathway and total hip and knee arthroplasty

Comparison: 05 Care Pathway vs standard care

Outcome: 06 Hospitalisation cost

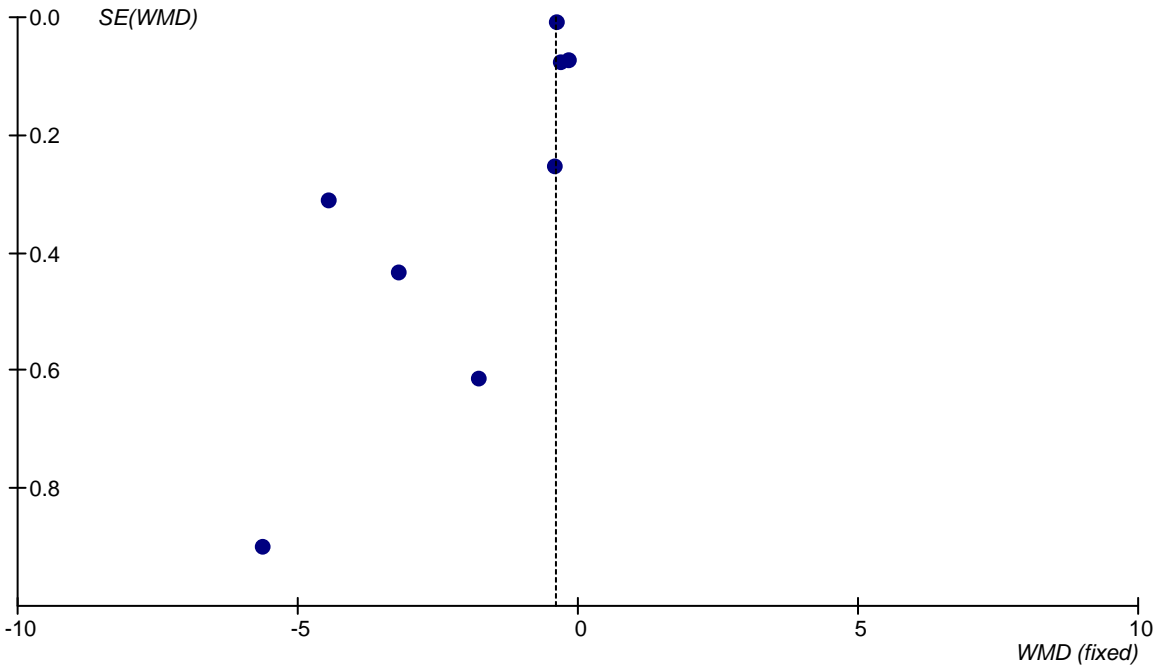

Supplement: MOESM11 [file 9599400]
